# Supplementary material for: Small Field Plots Can Cause Substantial Uncertainty in Gridded Aboveground Biomass Products from Airborne Lidar Data
Source: MDPI journal article supplement (doi:10.3390/rs15143509), 2023-07-12
Supplement: s1 [file s1]

**Small field plots can cause substantial uncertainty in gridded aboveground biomass products from airborne lidar data**

**SUPPLEMENTAL TABLES**

Table S1. Equation 1 estimated parameters used for AGB prediction for 0.04 ha pixels from NEON plot data.

| <b>General model</b>                |             |           |           |
|-------------------------------------|-------------|-----------|-----------|
| <b>Ecoregion</b>                    | <b>Site</b> | <b>a1</b> | <b>b1</b> |
| All                                 | --          | 19.14828  | 0.80071   |
| <b>Ecoregion models</b>             |             |           |           |
| <b>Ecoregion</b>                    | <b>Site</b> | <b>a1</b> | <b>b1</b> |
| Boreal forests                      | --          | 8.51490   | 1.20983   |
| Conifer forests                     | --          | 43.13899  | 0.51836   |
| Temperate grasslands & savannas     | --          | 24.96152  | 0.74700   |
| Temperate broadleaf & mixed forests | --          | 3.30149   | 1.36455   |
| <b>Site models</b>                  |             |           |           |
| <b>Ecoregion</b>                    | <b>Site</b> | <b>a1</b> | <b>b1</b> |
| Boreal forests                      | BONA        | 3.01866   | 1.63454   |
| Boreal forests                      | DEJU        | 10.58084  | 1.24051   |
| Conifer forests                     | NIWO        | 42.29598  | 0.85475   |
| Conifer forests                     | OSBS        | 5.42200   | 1.18996   |
| Conifer forests                     | RMNP        | 32.69153  | 0.87023   |
| Temperate grasslands & savannas     | CLBJ        | 6.84821   | 1.57687   |
| Temperate grasslands & savannas     | UKFS        | 12.96601  | 0.95026   |
| Temperate broadleaf & mixed forests | LENO        | 3.92020   | 1.30690   |
| Temperate broadleaf & mixed forests | ORNL        | 2.68918   | 1.37418   |
| Temperate broadleaf & mixed forests | TALL        | 6.14984   | 1.15520   |
| Temperate broadleaf & mixed forests | TREE        | 6.64974   | 1.10761   |

Table S2. Equation 1 estimated parameters used for AGB prediction for pixels of varying size from ForestGEO plot data at SERC and SCBI (combined).

| <b>Plot/pixel size</b> | <b>a1</b> | <b>b1</b> |
|------------------------|-----------|-----------|
| 0.04 ha                | 5.10097   | 1.21271   |
| 0.25 ha                | 12.59873  | 0.94709   |
| 1 ha                   | 13.14767  | 0.93391   |

## SUPPLEMENTAL FIGURES

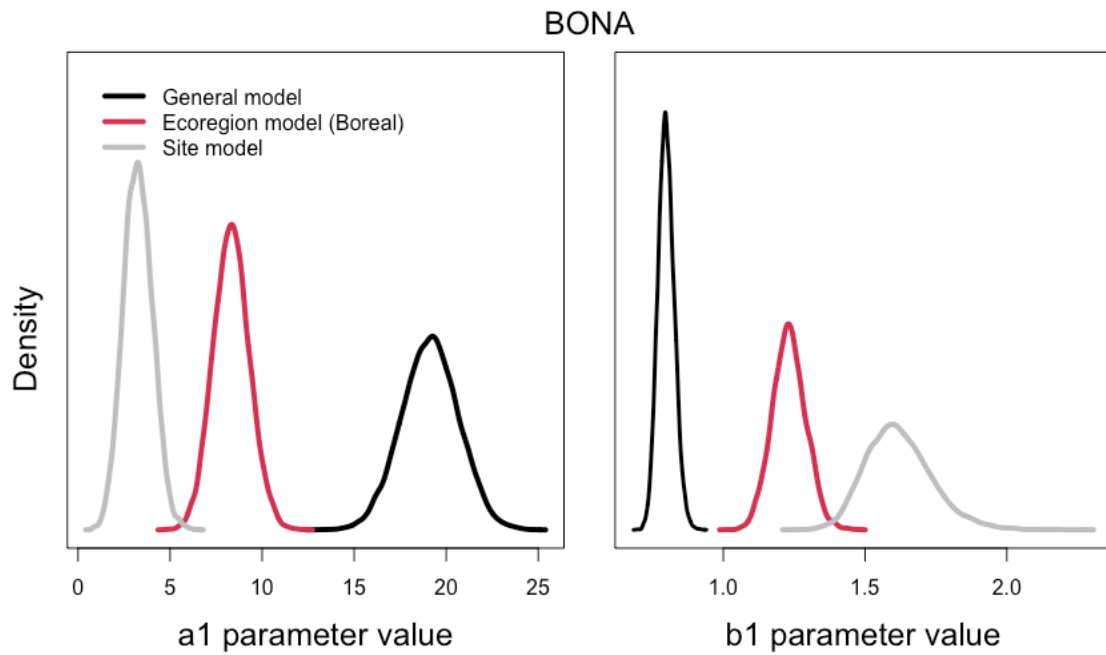

Figure S1. Parameter estimates for MCH-AGB models (Equation 1) for the BONA site. Parameter estimates are shown for the general model (fit with all data), ecoregion-specific model, and site-specific model. The density plots show the distribution of estimates among all “wild” bootstrapping iterations.

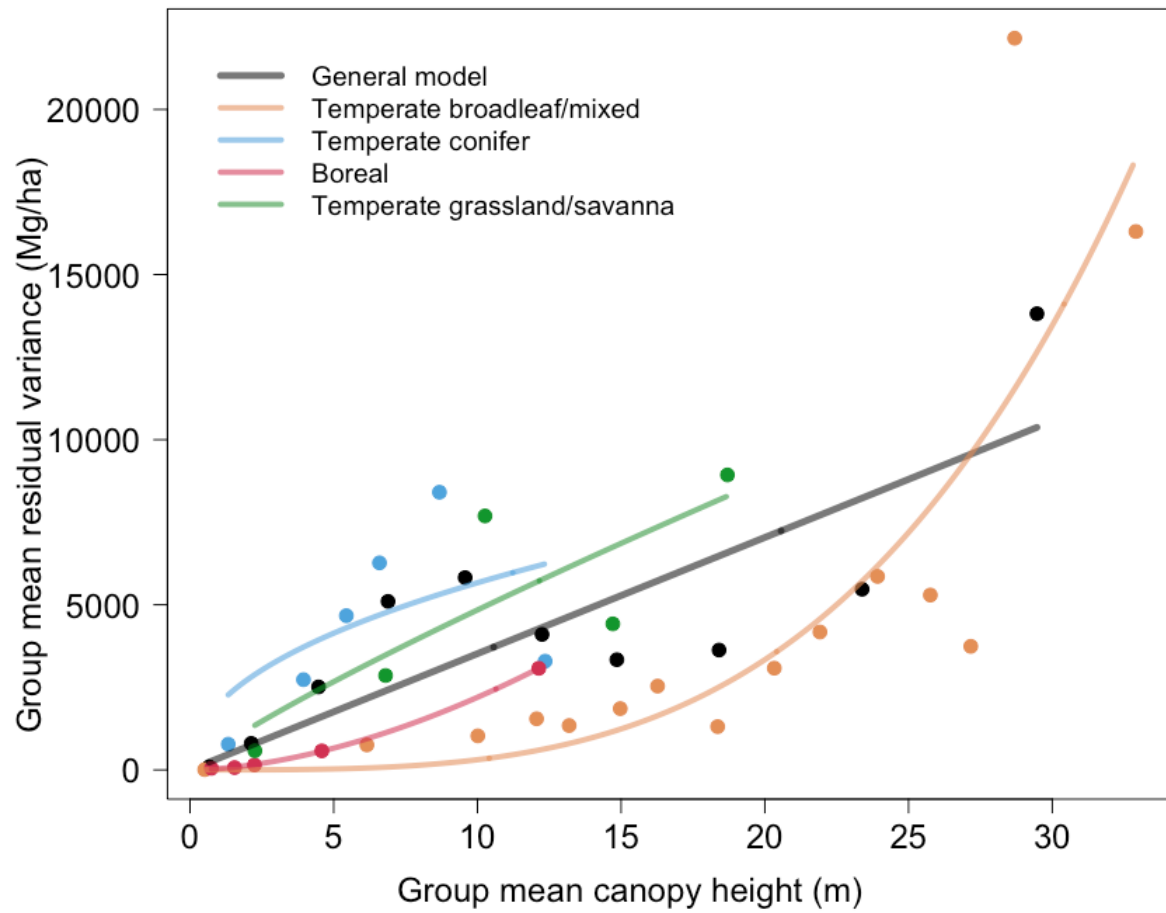

Figure S2. Fitted models describing residual variance as a function of canopy height (Equation 2) for the general model (black) and for each ecoregion-specific model (colors).

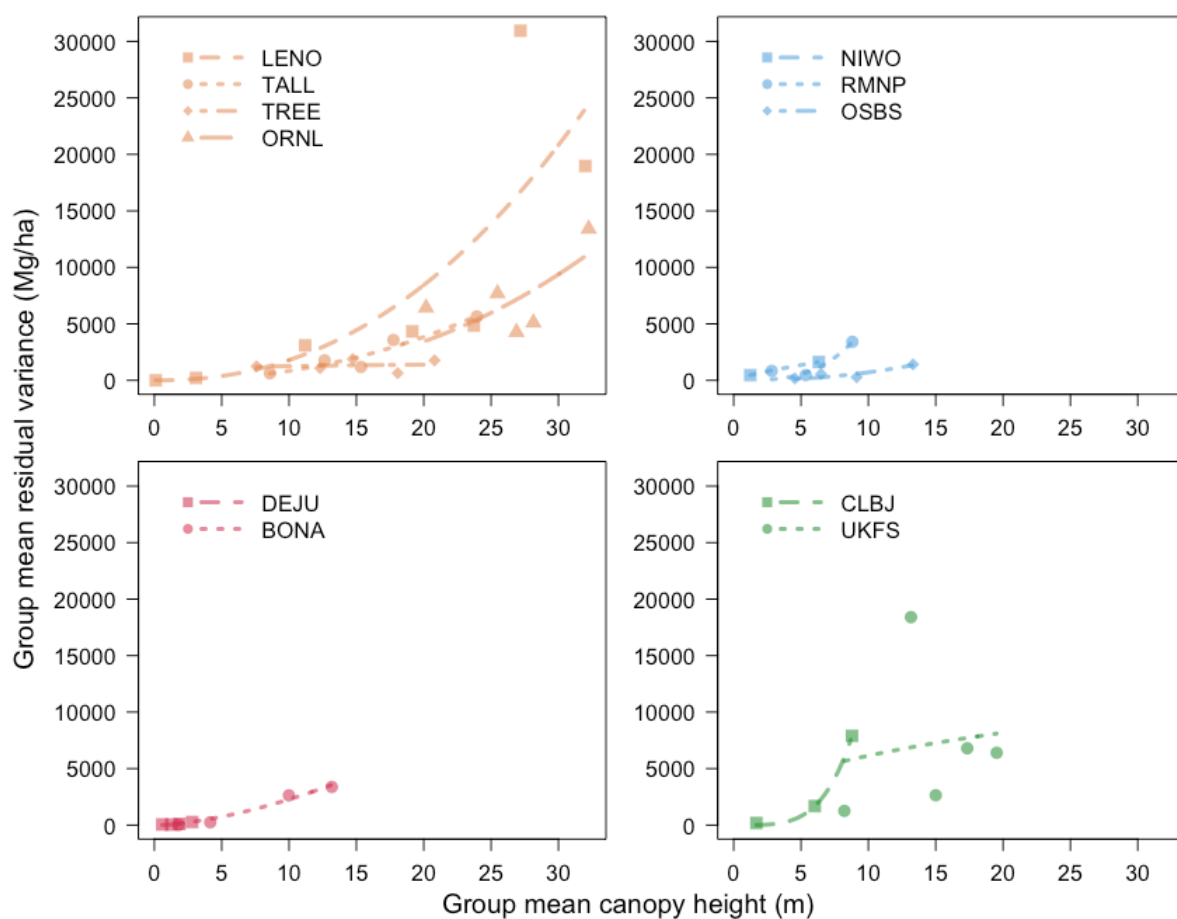

Figure S3. Fitted models describing residual variance as a function of canopy height (Equation 2) for each site-specific model within ecoregions. One panel is shown per ecoregion.

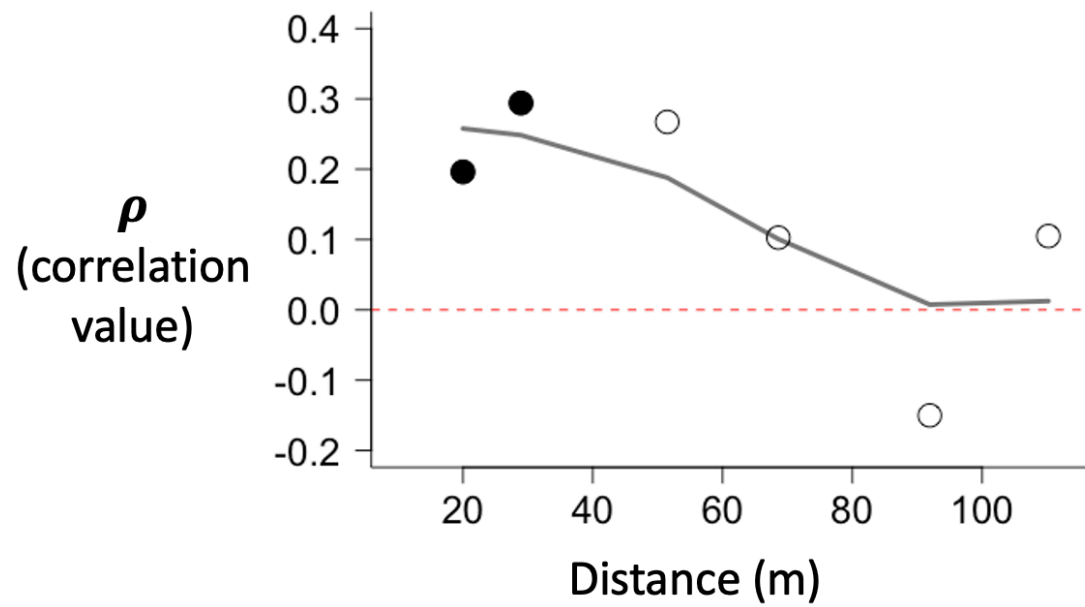

Figure S4. Estimated empirical spatial correlogram describing how the correlation between model residual values changes with distance. Solid points indicate correlation values that were statistically significant ( $P < 0.05$ ).

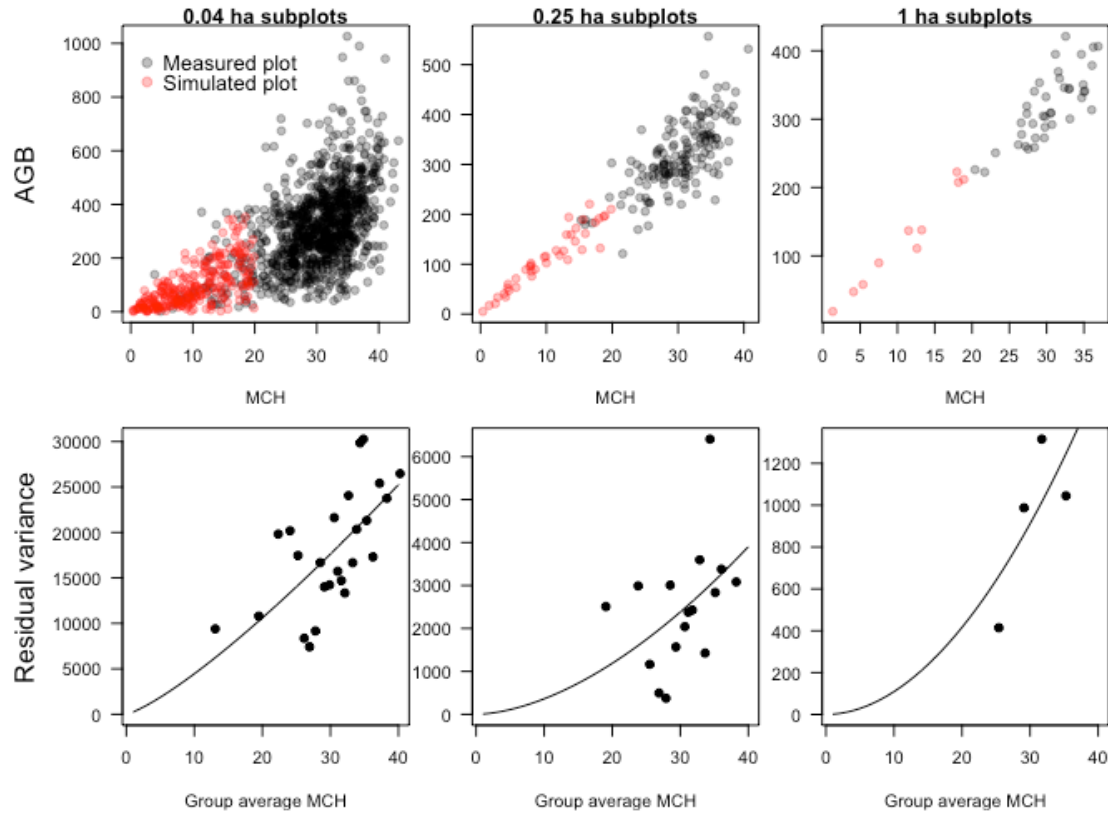

Figure S5. Megaplot data from the SCBI and SERC sites used to compare 1-ha pixel-level uncertainty in AGB estimated from 0.04 ha subplots (left), 0.25 ha subplots (middle), and 1 ha subplots (right). Because megaplots only covered forests with greater AGB values, 10 ha total of simulated data were added (red points, top row) using the relationship between residual variance and MCH fit with observed values (bottom row).

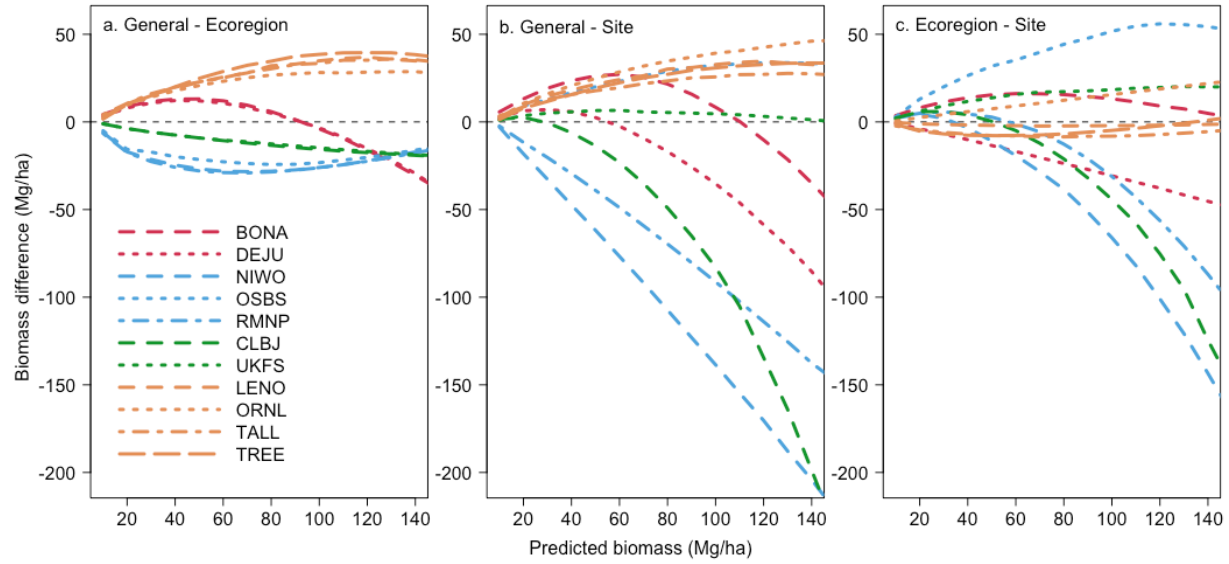

Figure S6. Differences in predicted AGB using the general, ecoregion-specific, or site-specific models for each site (Equation 1). Predicted AGB values are the average predicted values for 1-ha pixels across all bootstrap iterations. For each panel, the x-axis values reflect predicted biomass of the broader model type (*i.e.* the general model for a-b, and the ecoregion model for c).
