# Supplementary material for: Small Field Plots Can Cause Substantial Uncertainty in Gridded Aboveground Biomass Products from Airborne Lidar Data
Source: MDPI journal article supplement (doi:10.3390/rs15143509), 2023-07-12
Supplement: s1 [file s1]

Archive with 1 entries (1 files):
- remotesensing-2410321-supplementary.pdf
